# Supplementary material for: Genome-Wide Identification of Human Functional DNA Using a Neutral Indel Model
Source: PLOS journal article supplement (doi:10.1371/journal.pcbi.0020005), 2006-01-10
Supplement: S1 (10.1371/journal.pcbi.0020005.s001) [file journal.pcbi.0020005.s001]

Mouse chromosome start end Fragment Human chrom start end

mm5.chrUn_random 1670203 1671521 CAAA01075473.1 hg17.chr1 34266577 34267296

mm5.chrUn_random 2763841 2765880 CAAA01078169.1 hg17.chr15 74777870 74778147

mm5.chrUn_random 3339003 3350479 CAAA01079499.1 hg17.chr2 49208656 49209460

mm5.chrUn_random 3358645 3364338 CAAA01079523.1 hg17.chr2 49287952 49289216

mm5.chrUn_random 3365338 3368656 CAAA01079526.1 hg17.chr2 49289216 49290320

mm5.chrUn_random 3647516 3649472 CAAA01080225.1 hg17.chr18 30905184 30905830

mm5.chrUn_random 3736273 3739980 CAAA01080460.1 hg17.chr2 180614648 180618333

mm5.chrUn_random 4445299 4447357 CAAA01081827.1 hg17.chr11 122351224 122352817

mm5.chrUn_random 4611385 4612457 CAAA01082256.1 hg17.chr8 53547337 53547666

mm5.chrUn_random 4643425 4644830 CAAA01082290.1 hg17.chr9 28311752 28313056

mm5.chrUn_random 5823368 5824869 CAAA01083935.1 hg17.chr11 122394436 122395870

mm5.chrUn_random 6055196 6056701 CAAA01084365.1 hg17.chr2 77467739 77468485

mm5.chrUn_random 6080811 6085061 CAAA01084441.1 hg17.chr2 180460130 180465374

mm5.chrUn_random 6086061 6088712 CAAA01084442.1 hg17.chr8 111638493 111640963

mm5.chrUn_random 7311770 7312857 CAAA01086216.1 hg17.chr15 77779327 77780273

mm5.chrUn_random 8507248 8508543 CAAA01088626.1 hg17.chr8 136516876 136517659

mm5.chrUn_random 8554188 8554970 CAAA01088744.1 hg17.chr2 140965821 140966507

mm5.chrUn_random 8667391 8668719 CAAA01088996.1 hg17.chr2 140828468 140829317

mm5.chrUn_random 9291787 9292861 CAAA01090199.1 hg17.chr1 6488933 6489738

mm5.chrUn_random 9578190 9583814 CAAA01091129.1 hg17.chr2 140835767 140840780

mm5.chrUn_random 10013202 10017249 CAAA01092285.1 hg17.chr2 140950319 140964045

mm5.chrUn_random 10041975 10044911 CAAA01092334.1 hg17.chr2 140890076 140908145

mm5.chrUn_random 10048175 10050079 CAAA01092352.1 hg17.chr2 180469759 180470109

mm5.chrUn_random 10051079 10068357 CAAA01092365.1 hg17.chr2 180542955 180583055

mm5.chrUn_random 10069357 10075020 CAAA01092379.1 hg17.chr2 180583807 180584202

mm5.chrUn_random 10473203 10474496 CAAA01093244.1 hg17.chr15 31661966 31663057

mm5.chrUn_random 10480913 10482526 CAAA01093259.1 hg17.chr2 164196770 164197938

mm5.chrUn_random 10978341 10979827 CAAA01094452.1 hg17.chr15 77741480 77742627

mm5.chrUn_random 11081302 11083087 CAAA01094621.1 hg17.chr2 49190880 49191206

mm5.chrUn_random 11127510 11128630 CAAA01094684.1 hg17.chr2 140872350 140880258

mm5.chrUn_random 11168165 11169630 CAAA01094724.1 hg17.chr6 69173303 69180656

mm5.chrUn_random 11891328 11892563 CAAA01096184.1 hg17.chr15 77735759 77736588

mm5.chrUn_random 11897683 11900480 CAAA01096192.1 hg17.chr15 77743734 77745542

mm5.chrUn_random 11920378 11921771 CAAA01096258.1 hg17.chr9 28307075 28307389

mm5.chrUn_random 11948240 11950740 CAAA01096273.1 hg17.chr2 239809486 239811989

mm5.chrUn_random 12135235 12136968 CAAA01096625.1 hg17.chr4 157133289 157134512

mm5.chrUn_random 12145128 12146303 CAAA01096635.1 hg17.chr18 30966664 30972685

mm5.chrUn_random 12160416 12161695 CAAA01096643.1 hg17.chr4 149451496 149452085

mm5.chrUn_random 12164875 12167348 CAAA01096647.1 hg17.chr4 149454758 149455799

mm5.chrUn_random 12221052 12222413 CAAA01096811.1 hg17.chr8 136503628 136504957

mm5.chrUn_random 12275028 12276081 CAAA01096927.1 hg17.chr8 18939063 18939830

mm5.chrUn_random 12379270 12396546 CAAA01097145.1 hg17.chr2 172768925 172786102

mm5.chrUn_random 13013119 13021844 CAAA01098311.1 hg17.chr4 157114150 157130361

mm5.chrUn_random 13024864 13029899 CAAA01098336.1 hg17.chr4 157078835 157083013

mm5.chrUn_random 13041732 13044611 CAAA01098383.1 hg17.chr4 156993779 157044361

mm5.chrUn_random 13505296 13506334 CAAA01098964.1 hg17.chr15 98838776 98849131

mm5.chrUn_random 13654897 13656138 CAAA01099140.1 hg17.chr10 71316305 71317161

mm5.chrUn_random 13687381 13688308 CAAA01099164.1 hg17.chr10 71284411 71312491

mm5.chrUn_random 14133915 14134988 CAAA01099779.1 hg17.chr6 69225479 69226550

mm5.chrUn_random 14144942 14146256 CAAA01099815.1 hg17.chr6 69099545 69100837

mm5.chrUn_random 14147256 14148445 CAAA01099824.1 hg17.chr6 69180836 69182025

mm5.chrUn_random 14153736 14156067 CAAA01099849.1 hg17.chr6 69205129 69206633

mm5.chrUn_random 14157067 14158383 CAAA01099854.1 hg17.chr6 69208798 69209819

mm5.chrUn_random 14159383 14160726 CAAA01099857.1 hg17.chr5 94466691 94467571

mm5.chrUn_random 14165860 14166530 CAAA01099879.1 hg17.chr15 77761054 77761721

mm5.chrUn_random 14215520 14216564 CAAA01100015.1 hg17.chr15 77800401 77801445

mm5.chrUn_random 14891482 14893290 CAAA01101682.1 hg17.chr2 239812760 239814530

mm5.chrUn_random 14894290 14895336 CAAA01101685.1 hg17.chr2 140964646 140965170

mm5.chrUn_random 14896336 14898350 CAAA01101689.1 hg17.chr4 157093148 157094091

mm5.chrUn_random 14903537 14904877 CAAA01101694.1 hg17.chr2 180470153 180470988

mm5.chrUn_random 14969045 14970197 CAAA01101837.1 hg17.chr2 239815816 239816859

mm5.chrUn_random 15088030 15089486 CAAA01102188.1 hg17.chr8 122474494 122474714

mm5.chrUn_random 15096168 15099731 CAAA01102213.1 hg17.chr9 28331346 28334406

mm5.chrUn_random 15332578 15333824 CAAA01102691.1 hg17.chr18 30953055 30953784

mm5.chrUn_random 15826524 15828134 CAAA01103874.1 hg17.chr8 18930848 18931141

mm5.chrUn_random 15954713 15956138 CAAA01104092.1 hg17.chr18 30956260 30956952

mm5.chrUn_random 15957138 15958180 CAAA01104105.1 hg17.chr8 3276159 3277201

mm5.chrUn_random 16002700 16003766 CAAA01104171.1 hg17.chr8 75959481 75960547

mm5.chrUn_random 16329861 16331536 CAAA01105130.1 hg17.chr2 140870499 140871064

mm5.chrUn_random 16563099 16563762 CAAA01105526.1 hg17.chr4 157070551 157071214

mm5.chrUn_random 17097812 17099739 CAAA01106567.1 hg17.chr15 77754581 77754973

mm5.chrUn_random 17132271 17133983 CAAA01106658.1 hg17.chr8 122510677 122510993

mm5.chrUn_random 17216681 17221288 CAAA01107040.1 hg17.chr2 77461417 77465599

mm5.chrUn_random 17224382 17232936 CAAA01107051.1 hg17.chr2 77479675 77487684

mm5.chrUn_random 17233936 17247377 CAAA01107065.1 hg17.chr2 77501604 77514919

mm5.chrUn_random 17248377 17251795 CAAA01107069.1 hg17.chr2 77515245 77518044

mm5.chrUn_random 17252795 17257199 CAAA01107084.1 hg17.chr2 77538365 77542004

mm5.chrUn_random 17258199 17263993 CAAA01107088.1 hg17.chr2 77544416 77548804

mm5.chrUn_random 17282374 17290804 CAAA01107114.1 hg17.chr2 164071088 164088581

mm5.chrUn_random 17291804 17294223 CAAA01107122.1 hg17.chr2 164061649 164063892

mm5.chrUn_random 17320268 17322183 CAAA01107220.1 hg17.chr8 69564979 69566575

mm5.chrUn_random 17409847 17411212 CAAA01107693.1 hg17.chr8 122451536 122452582

mm5.chrUn_random 17426048 17427247 CAAA01107751.1 hg17.chr8 84090036 84127604

mm5.chrUn_random 17711662 17713197 CAAA01109058.1 hg17.chr10 71222738 71223126

mm5.chrUn_random 17716437 17717892 CAAA01109064.1 hg17.chr10 71314180 71314546

mm5.chrUn_random 17718892 17720548 CAAA01109067.1 hg17.chr15 98857418 98858362

mm5.chrUn_random 17729692 17730992 CAAA01109098.1 hg17.chr1 34201045 34202344

mm5.chrUn_random 17802317 17803812 CAAA01109355.1 hg17.chr15 77846554 77847587

mm5.chrUn_random 17843571 17844751 CAAA01109498.1 hg17.chr8 3263606 3264442

mm5.chrUn_random 17845751 17847417 CAAA01109502.1 hg17.chr8 3317279 3318673

mm5.chrUn_random 17853166 17854555 CAAA01109506.1 hg17.chr8 3277787 3278193

mm5.chrUn_random 17928946 17930311 CAAA01110167.1 hg17.chr8 84144958 84145851

mm5.chrUn_random 17964438 17965521 CAAA01110269.1 hg17.chr18 30992677 30993223

mm5.chrUn_random 17997944 17999047 CAAA01110550.1 hg17.chr11 32489606 32490623

mm5.chrUn_random 18006707 18007710 CAAA01110564.1 hg17.chr18 27259540 27260105

mm5.chrUn_random 18008710 18010242 CAAA01110570.1 hg17.chr11 43822650 43871518

mm5.chrUn_random 18013318 18014486 CAAA01110584.1 hg17.chr11 43771205 43771799

mm5.chrUn_random 18015486 18016552 CAAA01110587.1 hg17.chr11 60316807 60317867

mm5.chrUn_random 18017552 18018617 CAAA01110593.1 hg17.chr8 84088306 84089179

mm5.chrUn_random 18019617 18020780 CAAA01110596.1 hg17.chr15 31685608 31686517

mm5.chrUn_random 18024361 18025821 CAAA01110602.1 hg17.chr8 18934950 18936409

mm5.chrUn_random 18029311 18030994 CAAA01110608.1 hg17.chr8 18926544 18926782

mm5.chrUn_random 18031994 18033016 CAAA01110611.1 hg17.chr8 75930742 75931470

mm5.chrUn_random 18034016 18035138 CAAA01110617.1 hg17.chr8 69580970 69581308

mm5.chrUn_random 18036138 18037637 CAAA01110620.1 hg17.chr8 69696914 69698204

mm5.chrUn_random 18043774 18045549 CAAA01110631.1 hg17.chr8 69638081 69639694

mm5.chrUn_random 18051114 18052946 CAAA01110644.1 hg17.chr8 119117435 119118944

mm5.chrUn_random 18119918 18120936 CAAA01110814.1 hg17.chr8 439893 440706

mm5.chrUn_random 18136413 18137438 CAAA01110854.1 hg17.chr9 28193521 28194467

mm5.chrUn_random 18155128 18156753 CAAA01110903.1 hg17.chr15 74763891 74765372

mm5.chrUn_random 18486136 18487211 CAAA01111914.1 hg17.chr2 140919766 140920543

mm5.chrUn_random 18866977 18868127 CAAA01113011.1 hg17.chr5 131840590 131841303

mm5.chrUn_random 21085169 21086767 CAAA01119734.1 hg17.chr2 140820006 140821421

mm5.chrUn_random 21087767 21090426 CAAA01119737.1 hg17.chr2 140826339 140827869

mm5.chrUn_random 21091426 21094642 CAAA01119744.1 hg17.chr2 140832334 140835544

mm5.chrUn_random 21103057 21105069 CAAA01119754.1 hg17.chr2 140857578 140859014

mm5.chrUn_random 21106069 21109177 CAAA01119757.1 hg17.chr2 140862040 140864551

mm5.chrUn_random 21175647 21179874 CAAA01120030.1 hg17.chr2 172786758 172908609

mm5.chrUn_random 22933370 22934345 CAAA01124587.1 hg17.chr2 164095854 164120069

mm5.chrUn_random 22938288 22940553 CAAA01124602.1 hg17.chr2 164120968 164123167

mm5.chrUn_random 22941553 22944399 CAAA01124606.1 hg17.chr2 164124644 164142118

mm5.chrUn_random 24796896 24798712 CAAA01128323.1 hg17.chr11 122402655 122403777

mm5.chrUn_random 27797509 27798687 CAAA01134454.1 hg17.chr15 77707081 77716730

mm5.chrUn_random 27980704 27982060 CAAA01134815.1 hg17.chr5 131939061 131942650

mm5.chrUn_random 28850987 28852137 CAAA01136739.1 hg17.chr1 34214927 34219028

mm5.chrUn_random 29343480 29345103 CAAA01137643.1 hg17.chr2 140789963 140791587

mm5.chrUn_random 29350283 29354677 CAAA01137657.1 hg17.chr2 140813478 140817370

mm5.chrUn_random 29355677 29357667 CAAA01137661.1 hg17.chr2 140818007 140819997

mm5.chrUn_random 31202685 31204690 CAAA01141638.1 hg17.chr6 69076347 69077744

mm5.chrUn_random 33237744 33239396 CAAA01145562.1 hg17.chr6 69155325 69155800

mm5.chrUn_random 33652153 33653422 CAAA01146442.1 hg17.chr8 136520421 136520730

mm5.chrUn_random 34969181 34970248 CAAA01149121.1 hg17.chr8 122447785 122448743

mm5.chrUn_random 35076982 35078054 CAAA01149411.1 hg17.chr2 239808432 239808960

mm5.chrUn_random 36260552 36263544 CAAA01151570.1 hg17.chr2 239751598 239778505

mm5.chrUn_random 36266656 36267714 CAAA01151586.1 hg17.chr1 34338794 34343719

mm5.chrUn_random 36578026 36579583 CAAA01152530.1 hg17.chr2 239778681 239808311

mm5.chrUn_random 38262423 38263446 CAAA01156149.1 hg17.chr1 34302972 34310551

mm5.chrUn_random 39777935 39779874 CAAA01159306.1 hg17.chr2 239737750 239739031

mm5.chrUn_random 40129652 40130727 CAAA01159985.1 hg17.chr4 149535422 149535789

mm5.chrUn_random 40513513 40514587 CAAA01160955.1 hg17.chr6 30399902 30400433

mm5.chrUn_random 42616695 42618277 CAAA01164797.1 hg17.chr6 69086075 69087203

mm5.chrUn_random 45473777 45475816 CAAA01170683.1 hg17.chr11 122331933 122341237

mm5.chrUn_random 45476816 45477998 CAAA01170691.1 hg17.chr18 51013445 51014463

mm5.chrUn_random 46044380 46045751 CAAA01171800.1 hg17.chr6 69254393 69255764

mm5.chrUn_random 46321530 46322815 CAAA01172519.1 hg17.chr10 71225871 71226695

mm5.chrUn_random 46478711 46480543 CAAA01172953.1 hg17.chr10 71198733 71200091

mm5.chrUn_random 64474045 64476116 CAAA01222248.1 hg17.chr2 239743191 239745379

Supplementary Table 1. Unplaced mouse sequence fragments showing very high conservation (>99% sequence identity, no gaps) relative to human DNA, but no supporting evidence for conservation in dog or rat. These 146 fragments, of which 285 kb aligns to human DNA in the BlastZ alignments we used, most likely represent sequence contamination from primates and were thus subsequently excluded from our analysis.
